# Supplementary material
Source: MDPI journal article supplement (https://www.mdpi.com/2073-4433/14/6/1046)
Supplement: s1 [file s1]

## Supplementary Materials:

# An Empirical Model of Gross Primary Productivity (GPP) and Relations between GPP and Its Driving Factors, Biogenic Volatile Organic Compounds in a Subtropical Conifer Plantation in China

Jianhui Bai <sup>1,\*</sup>, Fengting Yang <sup>2</sup>, Huimin Wang <sup>2</sup> and Mingjie Xu <sup>3</sup>

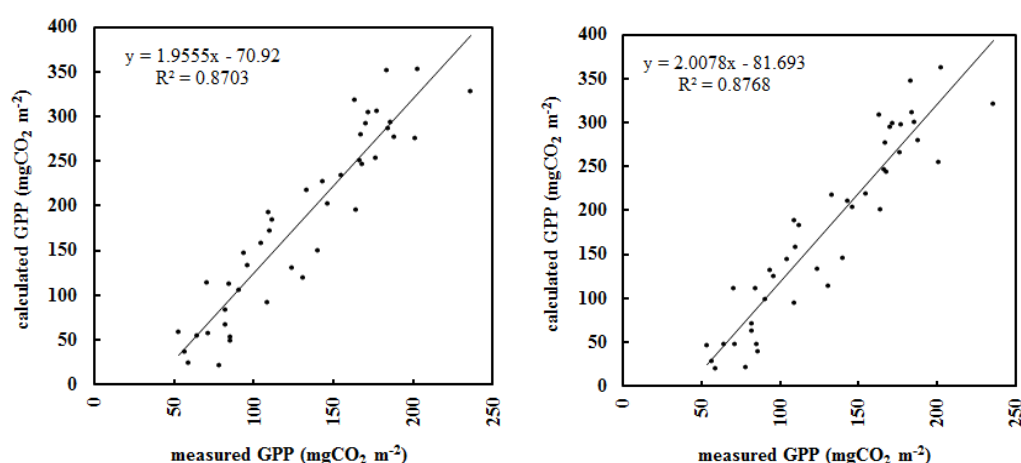

**Figure S1.** Scatter plot of calculated versus measured monthly sums of GPP in Qianyanzhou subtropical coniferous plantation under atmospheric conditions  $S/Q \geq 0.5$ , using the 3-factor (**left**) and 2-factor (**right**) EMGPP models.

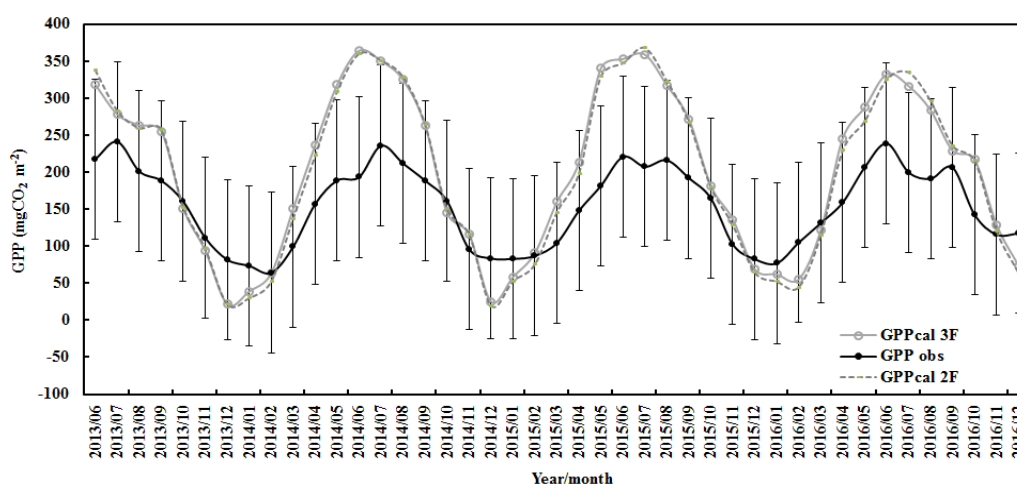

**Figure S2.** Observed and calculated monthly sums of GPP using the 3-factor and 2-factor EMGPP models ( $GPP_{obs}$ ,  $GPP_{cal\ 3F}$  and  $GPP_{cal\ 2F}$ , respectively) with error bars showing 2 times standard deviations of the observed GPPs during 2013–2016 ( $S/Q=0-1$ ).

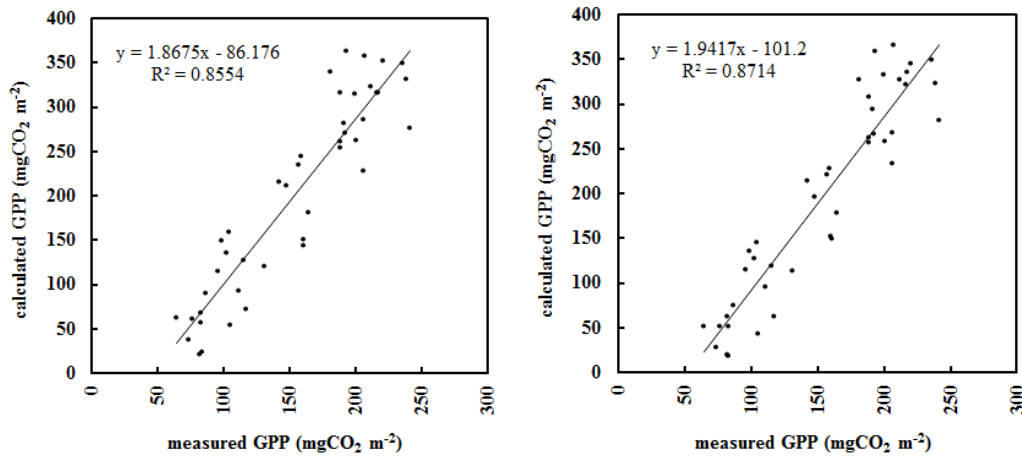

**Figure S3.** Scatter plot of calculated versus measured monthly sums of GPP in Qianyanzhou subtropical coniferous plantation under all-sky conditions ( $S/Q=0-1$ ), using the 3-factor (left) and 2-factor (right) EMGPP models.

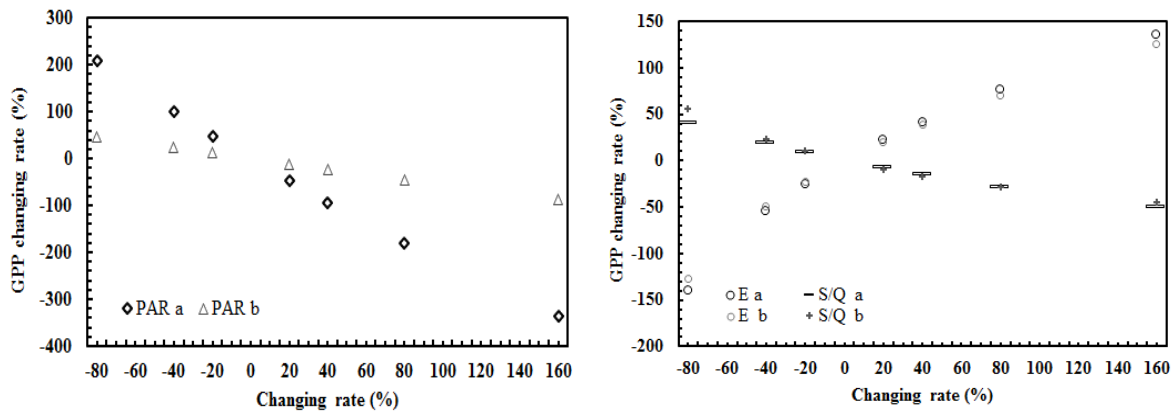

**Figure S4.** GPP change rates (%) with the change in one factor and other factors kept at their original levels under realistic atmospheric conditions. a and b represent the change rates that respond to each influencing factor for  $S/Q < 0.5$  and  $S/Q \geq 0.5$ , respectively. (GPP change rates with the change in PAR, left, and E and  $S/Q$ , right)

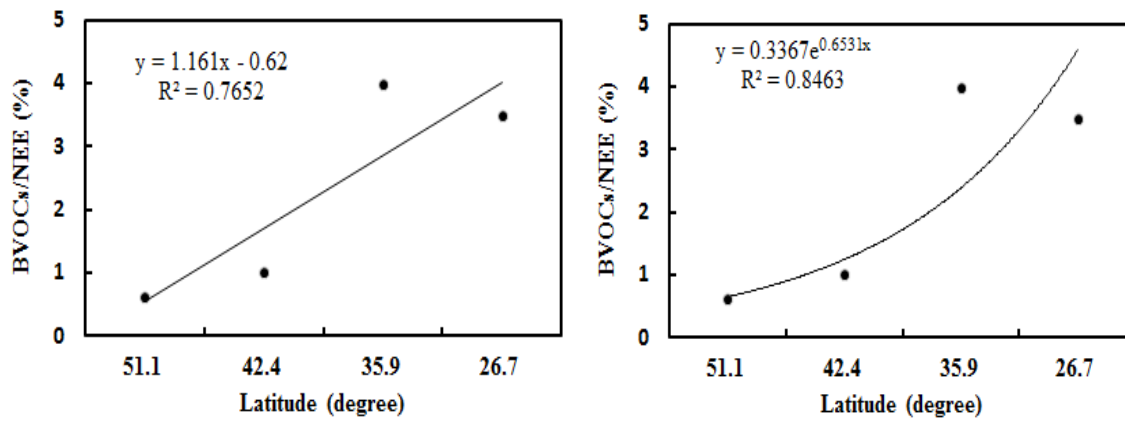

**Figure S5.** Linear (left) and nonlinear (right) relationships between BVOCs/NEE and latitude for the forests. The lines are linear and nonlinear fits to the data for BVOCs/NEE and latitude.

**Table S1.** Same as Table 9 but for annual sums of GPP simulations ( $\text{mg CO}_2 \text{ m}^{-2}$ ) ( $S/Q \geq 0.5$ ).

| 3-F<br>Time peri-<br>od | $\delta_{\text{avg}}$ | GPP <sub>cal</sub> | GPP <sub>obs</sub> | cal/obs | 2-F<br>Time peri-<br>od | $\delta_{\text{avg}}$ | GPP <sub>cal</sub> | GPP <sub>obs</sub> | cal/obs |
|-------------------------|-----------------------|--------------------|--------------------|---------|-------------------------|-----------------------|--------------------|--------------------|---------|
| 2013                    | 26.60                 | 1189.02            | 939.18             | 1.26    | 2013                    | 26.50                 | 1188.05            | 939.18             | 1.26    |
| 2014                    | 51.24                 | 2205.43            | 1458.24            | 1.51    | 2014                    | 46.94                 | 2142.67            | 1458.24            | 1.47    |
| 2015                    | 54.36                 | 2317.56            | 1501.39            | 1.54    | 2015                    | 49.96                 | 2251.46            | 1501.39            | 1.50    |
| 2016                    | 27.92                 | 2151.60            | 1682.05            | 1.28    | 2016                    | 25.46                 | 2110.29            | 1682.05            | 1.25    |
| 2013–2014               | 41.59                 | 3394.45            | 2397.42            | 1.42    | 2013–2014               | 38.93                 | 3330.72            | 2397.42            | 1.39    |
| 2013–2016               | 40.90                 | 7863.61            | 5580.85            | 1.41    | 2013–2016               | 37.84                 | 7692.47            | 5580.85            | 1.38    |

**Table S2.** Same as Table 7 and for hourly GPP ( $\text{mg CO}_2 \text{ m}^{-2}$ ) simulations ( $S/Q=0-1$ ) using a 3-factor model.

| Time<br>period | $\delta_{\text{avg}}$ | NMSE  | $\sigma_{\text{cal}}$ | $\sigma_{\text{obs}}$ | cal/obs | n     | MAD                                                |       | RMSE                                               |        |
|----------------|-----------------------|-------|-----------------------|-----------------------|---------|-------|----------------------------------------------------|-------|----------------------------------------------------|--------|
|                |                       |       |                       |                       |         |       | ( $\text{mg CO}_2 \text{ m}^{-2} \text{ s}^{-1}$ ) | (%)   | ( $\text{mg CO}_2 \text{ m}^{-2} \text{ s}^{-1}$ ) | (%)    |
| 2013           | 117.15                | 0.490 | 0.374                 | 0.291                 | 1.15    | 2493  | 0.287                                              | 59.43 | 0.535                                              | 111.05 |
| 2014           | 148.47                | 0.612 | 0.392                 | 0.295                 | 1.37    | 4181  | 0.301                                              | 71.90 | 0.549                                              | 130.99 |
| 2015           | 146.85                | 0.614 | 0.382                 | 0.292                 | 1.43    | 4065  | 0.329                                              | 74.79 | 0.574                                              | 130.36 |
| 2016           | 149.48                | 0.605 | 0.369                 | 0.314                 | 1.24    | 3880  | 0.347                                              | 71.33 | 0.590                                              | 121.03 |
| 2013–2014      | 136.77                | 0.563 | 0.390                 | 0.295                 | 1.28    | 6674  | 0.296                                              | 66.83 | 0.544                                              | 122.88 |
| 2013–2016      | 142.74                | 0.586 | 0.381                 | 0.300                 | 1.31    | 14748 | 0.318                                              | 70.03 | 0.398                                              | 87.60  |

**Table S3.** Same as Table S2 and for hourly GPP ( $\text{mg CO}_2 \text{ m}^{-2}$ ) simulations ( $S/Q=0-1$ ) using a 2-factor model.

| Time<br>period | $\delta_{\text{avg}}$ | NMSE  | $\sigma_{\text{cal}}$ | $\sigma_{\text{obs}}$ | cal/obs | n     | MAD                                                |       | RMSE                                               |        |
|----------------|-----------------------|-------|-----------------------|-----------------------|---------|-------|----------------------------------------------------|-------|----------------------------------------------------|--------|
|                |                       |       |                       |                       |         |       | ( $\text{mg CO}_2 \text{ m}^{-2} \text{ s}^{-1}$ ) | (%)   | ( $\text{mg CO}_2 \text{ m}^{-2} \text{ s}^{-1}$ ) | (%)    |
| 2013           | 112.71                | 0.496 | 0.369                 | 0.291                 | 1.17    | 2493  | 0.281                                              | 58.31 | 0.530                                              | 110.00 |
| 2014           | 140.95                | 0.557 | 0.376                 | 0.295                 | 1.34    | 4181  | 0.289                                              | 69.00 | 0.536                                              | 127.94 |
| 2015           | 138.83                | 0.534 | 0.364                 | 0.292                 | 1.39    | 4065  | 0.306                                              | 69.62 | 0.554                                              | 125.78 |
| 2016           | 140.94                | 0.564 | 0.355                 | 0.314                 | 1.22    | 3880  | 0.329                                              | 67.57 | 0.574                                              | 117.80 |
| 2013–2014      | 130.40                | 0.532 | 0.373                 | 0.295                 | 1.27    | 6674  | 0.286                                              | 64.65 | 0.535                                              | 120.87 |
| 2013–2016      | 135.55                | 0.538 | 0.366                 | 0.300                 | 1.29    | 14748 | 0.303                                              | 66.62 | 0.378                                              | 83.23  |

**Table S4.** Same as Table 9 and for simulations of monthly sums of GPP ( $\text{mg CO}_2 \text{ m}^{-2}$ ) ( $S/Q=0-1$ ).

| 3-F<br>Time period | $\delta_{\text{avg}}$ | $\delta_{\text{max}}$ | GPP <sub>cal</sub> | GPP <sub>obs</sub> | cal/obs | 2-F<br>Time peri-<br>od | $\delta_{\text{avg}}$ | $\delta_{\text{max}}$ | GPP <sub>cal</sub> | GPP <sub>obs</sub> | cal/obs |
|--------------------|-----------------------|-----------------------|--------------------|--------------------|---------|-------------------------|-----------------------|-----------------------|--------------------|--------------------|---------|
| 2013               | 31.80                 | 73.50                 | 197.43             | 171.70             | 1.15    | 2013                    | 32.80                 | 73.62                 | 201.21             | 171.70             | 1.17    |
| 2014               | 45.86                 | 88.40                 | 199.72             | 146.00             | 1.37    | 2014                    | 46.37                 | 86.21                 | 195.03             | 146.00             | 1.34    |
| 2015               | 41.72                 | 87.58                 | 212.56             | 149.11             | 1.43    | 2015                    | 40.40                 | 81.43                 | 206.60             | 149.11             | 1.39    |
| 2016               | 35.53                 | 58.44                 | 196.01             | 157.48             | 1.25    | 2016                    | 37.51                 | 67.51                 | 191.66             | 157.48             | 1.22    |
| 2013–2014          | 40.68                 | 88.40                 | 198.88             | 155.47             | 1.28    | 2013–2014               | 41.37                 | 86.21                 | 197.31             | 155.47             | 1.27    |
| 2013–2016          | 39.53                 | 88.40                 | 201.90             | 154.26             | 1.31    | 2013–2016               | 40.02                 | 86.21                 | 198.32             | 154.26             | 1.29    |

**Table S5.** Same as Table 9 but for annual sums of GPP simulations ( $\text{mg CO}_2 \text{ m}^{-2}$ ) ( $S/Q=0-1$ ).

| 3-F<br>Time peri-<br>od | $\delta_{\text{avg}}$ | GPP <sub>cal</sub> | GPP <sub>obs</sub> | cal/obs | 2-F<br>Time peri-<br>od | $\delta_{\text{avg}}$ | GPP <sub>cal</sub> | GPP <sub>obs</sub> | cal/obs |
|-------------------------|-----------------------|--------------------|--------------------|---------|-------------------------|-----------------------|--------------------|--------------------|---------|
| 2013                    | 14.99                 | 1382.02            | 1201.88            | 1.15    | 2013                    | 17.19                 | 1408.45            | 1201.88            | 1.17    |
| 2014                    | 36.79                 | 2396.67            | 1752.05            | 1.37    | 2014                    | 33.58                 | 2340.39            | 1752.05            | 1.34    |
| 2015                    | 42.56                 | 2550.77            | 1789.31            | 1.43    | 2015                    | 38.55                 | 2479.16            | 1789.31            | 1.39    |
| 2016                    | 24.47                 | 2352.14            | 1889.81            | 1.24    | 2016                    | 21.70                 | 2299.12            | 1889.81            | 1.22    |
| 2013–2014               | 27.92                 | 3778.69            | 2953.92            | 1.28    | 2013–2014               | 26.91                 | 3748.84            | 2953.92            | 1.27    |
| 2013–2016               | 30.88                 | 8681.61            | 6633.04            | 1.41    | 2013–2016               | 28.57                 | 8527.92            | 6633.04            | 1.29    |

**Table S6.** GPP change rates (%) for  $S/Q < 0.5$  and  $S/Q \geq 0.5$  due to the change of one factor (%), while keeping all other factors at their original value. The averages of PAR, E, S/Q and air temperature ( $PAR_{avg}$ ,  $E_{avg}$ ,  $(S/Q)_{avg}$ ,  $T_{avg}$ ) in different time periods for  $S/Q < 0.5$  and  $S/Q \geq 0.5$  are also given.

| S/Q            | PAR    |       | E     |        | S/Q   |       | $PAR_{avg}$<br>$\mu\text{mol m}^{-2} \text{s}^{-1}$ | $T_{avg}$<br>$^{\circ}\text{C}$ | $E_{avg}$<br>hPa | $(S/Q)_{avg}$ |
|----------------|--------|-------|-------|--------|-------|-------|-----------------------------------------------------|---------------------------------|------------------|---------------|
|                | +20%   | −20%  | +20%  | −20%   | +20%  | −20%  |                                                     |                                 |                  |               |
| $S/Q < 0.5$    | −47.23 | 49.05 | 21.89 | −24.74 | −8.19 | 8.91  | 4.57                                                | 32.50                           | 27.98            | 0.38          |
| $S/Q \geq 0.5$ | −11.46 | 11.60 | 20.09 | −22.64 | −9.04 | 10.68 | 3.37                                                | 28.27                           | 27.71            | 0.76          |

**Table S7.** Isoprene and monoterpene emission changing rates (Iso REA and MT REA, %) for using relaxed eddy accumulation technique (REA) caused by the change of one factor (%), while keeping all other factors at their original value [27].

|         | PAR   |        | E    |       | S/Q  |       |
|---------|-------|--------|------|-------|------|-------|
|         | +20%  | −20%   | +20% | −20%  | +20% | −20%  |
| Iso REA | 161.6 | −156.2 | 86.9 | −90.7 | 28.7 | −30.6 |
| MT REA  | 31.9  | −26.2  | 6.4  | −7.1  | 1.8  | −2.0  |

[27] Bai, J.; Duhl, T. A primary generalized empirical model of BVOC emissions for some typical forests in China. *Atmos. Pollut. Res.* **2021**, *12*, 101126. <https://doi.org/10.1016/j.apr.2021.101126>.
